# Supplementary material for: Clinical Evaluation of Human Papillomavirus Screening With p16/Ki-67 Dual Stain Triage in a Large Organized Cervical Cancer Screening Program
Source: PubMed Central journal article supplement (PMC6515572; doi:10.1001/jamainternmed.2019.0306), 2019-05-13
Supplement: jamainternmed-e190306-s001.pdf [file jamainternmed-e190306-s001.pdf]

## Supplementary Online Content

Wentzensen N, Clarke MA, Bremer R, et al. Clinical evaluation of human papillomavirus screening with p16/Ki-67 dual stain triage in a large organized cervical cancer screening program. *JAMA Intern Med*. Published online May 13, 2019.

doi:10.1001/jamainternmed.2019.0306

**eTable 1.** Clinical Performance of Cytology, Dual Stain, and HPV16/18 Testing in Age Groups

**eTable 2.** Risk of CIN3+ and CIN2+ in Strata of Cytology, HPV16/18 Genotype, and Dual Stain Results

**eTable 3.** HPV16/18 and p16/Ki-67 Positivity by Histology and Cytology Results in 2066 Women Without Known Preceding Abnormal Co-Test

**eTable 4.** Performance of Cytology, Dual Stain, HPV16/18 and Combinations Among 2066 HPV-Positive Women Without Preceding Abnormal Co-Test to Detect CIN3+ (n=131) and CIN2+ (n=277)

**eTable 5.** Risk of CIN3+ and CIN2+ in Strata of Cytology, HPV16/18 Genotype and Dual Stain Results in Women With Preceding Normal Co-Tests

**eFigure 1.** Screening and Triage Algorithms

**eFigure 2.** Risk of CIN3+ in Strata of Cytology, Dual Stain, and HPV16/18 Among Women With Normal Preceding Co-Test

This supplementary material has been provided by the authors to give readers additional information about their work.

**eTable 1.** Clinical Performance of Cytology, Dual Stain, and HPV16/18 Testing in Age Groups

|                                               | <b>Cytology<br/>(95% CI)</b> | <b>Dual stain<br/>(95% CI)</b> | <b>HPV16/18<br/>(95% CI)</b>   |
|-----------------------------------------------|------------------------------|--------------------------------|--------------------------------|
| <b>Threshold</b>                              | ASC-US+                      | 1 dual stain positive cell     | Either HPV16 or HPV18 positive |
| <b>&lt;29 years<br/>(998 women, 80 CIN3+)</b> |                              |                                |                                |
| <b>Positivity</b>                             | 63.9%                        | 52.6%                          | 19.7%                          |
| <b>Sensitivity</b>                            | 86.3%                        | 86.3%                          | 55.0%                          |
| <b>Specificity</b>                            | 38.0%                        | 50.4%                          | 83.6%                          |
| <b>PPV</b>                                    | 10.8%                        | 13.2%                          | 22.6%                          |
| <b>NPV</b>                                    | 96.9%                        | 97.7%                          | 95.5%                          |
| <b>30-34 years<br/>(673 women, 66 CIN3+)</b>  |                              |                                |                                |
| <b>Positivity</b>                             | 58.8%                        | 51.2%                          | 21.1%                          |
| <b>Sensitivity</b>                            | 86.4%                        | 87.9%                          | 54.6%                          |
| <b>Specificity</b>                            | 44.2%                        | 52.9%                          | 82.5%                          |
| <b>PPV</b>                                    | 14.4%                        | 16.9%                          | 25.4%                          |
| <b>NPV</b>                                    | 96.8%                        | 97.6%                          | 94.4%                          |
| <b>35-44 years<br/>(719 women, 48 CIN3+)</b>  |                              |                                |                                |
| <b>Positivity</b>                             | 55.4%                        | 44.7%                          | 20.1%                          |
| <b>Sensitivity</b>                            | 79.2%                        | 85.4%                          | 41.7%                          |
| <b>Specificity</b>                            | 46.4%                        | 58.1%                          | 81.7%                          |
| <b>PPV</b>                                    | 9.6%                         | 12.7%                          | 14.0%                          |
| <b>NPV</b>                                    | 96.9%                        | 98.2%                          | 95.1%                          |
| <b>45+ years<br/>(835 women, 42 CIN3+)</b>    |                              |                                |                                |
| <b>Positivity</b>                             | 56.9%                        | 50.1%                          | 17.4%                          |
| <b>Sensitivity</b>                            | 83.3%                        | 97.6%                          | 50.0%                          |
| <b>Specificity</b>                            | 44.5%                        | 52.2%                          | 84.6%                          |
| <b>PPV</b>                                    | 7.4%                         | 9.8%                           | 14.7%                          |
| <b>NPV</b>                                    | 98.1%                        | 99.8%                          | 97.0%                          |

ASC-US: Atypical Squamous Cells of Undetermined Significance; PPV: positive predictive value; NPV: negative predictive value; CIN3+: cervical intraepithelial neoplasia grade 3 or worse

**eTable 2.** Risk of CIN3+ and CIN2+ in Strata of Cytology, HPV16/18 Genotype, and Dual Stain Results

| Stratum                        | All women in stratum | CIN3+ in stratum | Risk  | 95% Confidence Interval | CIN2+ in stratum | Risk  | 95% Confidence Interval |
|--------------------------------|----------------------|------------------|-------|-------------------------|------------------|-------|-------------------------|
| HSIL cytology; HPV16/18+; DS+  | 52                   | 33               | 63.5% | 49.0 - 76.4%            | 44               | 84.6% | 71.9 - 93.1%            |
| HSIL cytology; HPV16/18+; DS-  | 0                    | 0                | NE    | -                       | 0                | NE    | -                       |
| HSIL cytology; HPV16/18-; DS+  | 44                   | 26               | 59.1% | 43.2 - 73.7%            | 32               | 72.7% | 57.2 - 85.0%            |
| HSIL cytology; HPV16/18-; DS-  | 4                    | 1                | 25.0% | 0.6 - 80.6%             | 1                | 25.0% | 0.6 - 80.6%             |
| ASCH cytology; HPV16/18+; DS+  | 52                   | 20               | 38.5% | 25.3 - 53.0%            | 35               | 67.3% | 52.9 - 79.7%            |
| ASCH cytology; HPV16/18+; DS-  | 5                    | 0                | 0.0%  | 0.0 - 52.2%             | 1                | 20.0% | 0.5 - 71.6%             |
| ASCH cytology; HPV16/18-; DS+  | 87                   | 24               | 27.6% | 18.5 - 38.2%            | 42               | 48.3% | 37.4 - 59.2%            |
| ASCH cytology; HPV16/18-; DS-  | 11                   | 0                | 0.0%  | 0.0 - 28.5%             | 2                | 18.2% | 2.3 - 51.8%             |
| LSIL cytology; HPV16/18+; DS+  | 96                   | 22               | 22.9% | 14.9 - 32.6%            | 37               | 38.5% | 28.8 - 49.0%            |
| LSIL cytology; HPV16/18+; DS-  | 24                   | 0                | 0.0%  | 0.0 - 14.2%             | 1                | 4.2%  | 0.1 - 21.1%             |
| LSIL cytology; HPV16/18-; DS+  | 341                  | 16               | 4.7%  | 2.7 - 7.5%              | 54               | 15.8% | 12.1 - 20.2%            |
| LSIL cytology; HPV16/18-; DS-  | 262                  | 4                | 1.5%  | 0.4 - 3.9%              | 15               | 5.7%  | 3.2 - 9.3%              |
| ASCUS cytology; HPV16/18+; DS+ | 101                  | 23               | 22.8% | 15.0 - 32.2%            | 39               | 38.6% | 29.1 - 48.8%            |
| ASCUS cytology; HPV16/18+; DS- | 72                   | 3                | 4.2%  | 0.9 - 11.7%             | 9                | 12.5% | 5.9 - 22.4%             |
| ASCUS cytology; HPV16/18-; DS+ | 361                  | 20               | 5.5%  | 3.4 - 8.4%              | 54               | 15.0% | 11.4 - 19.1%            |
| ASCUS cytology; HPV16/18-; DS- | 393                  | 7                | 1.8%  | 0.7 - 3.6%              | 17               | 4.3%  | 2.5 - 6.8%              |
| NILM cytology; HPV16/18+; DS+  | 114                  | 14               | 12.3% | 6.9 - 19.7%             | 23               | 20.2% | 13.2 - 28.7%            |
| NILM cytology; HPV16/18+; DS-  | 107                  | 6                | 5.6%  | 2.1 - 11.8%             | 15               | 14.0% | 8.1 - 22.1%             |
| NILM cytology; HPV16/18-; DS+  | 362                  | 11               | 3.1%  | 1.5 - 5.4%              | 31               | 8.6%  | 5.9 - 12.0%             |
| NILM cytology; HPV16/18-; DS-  | 735                  | 6                | 0.8%  | 0.3 - 1.8%              | 20               | 2.7%  | 1.7 - 4.2%              |

HPV16/18+: positive for either HPV16 or HPV18; DS: Dual stain cytology; NILM: negative for intraepithelial lesion or malignancy, ASCUS: Atypical Squamous Cells of Undetermined Significance, LSIL: Low Grade Squamous Intraepithelial Lesions; ASC-H: Atypical Squamous Cells, Cannot Rule Out High-Grade Squamous Intraepithelial Lesion; HSIL: High Grade Squamous Intraepithelial Lesion; CIN3+: cervical intraepithelial neoplasia grade 3 or worse, CIN2+: cervical intraepithelial neoplasia grade 2 or worse; NE, not estimable

**eTable 3.** HPV16/18 and p16/Ki-67 Positivity by Histology and Cytology Results in 2066 Women Without Known Preceding Abnormal Co-Test

| Cytology Result | Total<br>N=2,066 |      | No Biopsy<br>N=588 |       | Benign<br>N=372 |     | CIN1<br>N=783 |     | CIN2<br>N=146 |      | CIN3/ AIS<br>N=130 |      | Cancer<br>N=1 |      | Other<br>N=46 |      |
|-----------------|------------------|------|--------------------|-------|-----------------|-----|---------------|-----|---------------|------|--------------------|------|---------------|------|---------------|------|
|                 | n                | %    | n                  | %     | n               | %   | n             | %   | n             | %    | n                  | %    | n             | %    | n             | %    |
| <b>Negative</b> | 877              | 42%  | 550                | 94%   | 126             | 34% | 138           | 18% | 31            | 21%  | 20                 | 15%  | 0             | 0%   | 12            | 26%  |
| HPV16/18+       | 143              | 16%  | 86                 | 16%   | 16              | 13% | 17            | 12% | 12            | 39%  | 10                 | 50%  | 0             | 0%   | 2             | 17%  |
| HR HPV12+       | 588              | 67%  | 367                | 67%   | 88              | 70% | 101           | 73% | 15            | 48%  | 9                  | 45%  | 0             | 0%   | 8             | 67%  |
| DS+             | 303              | 35%  | 173                | 32%   | 42              | 33% | 50            | 36% | 18            | 58%  | 15                 | 75%  | 0             | 0%   | 5             | 42%  |
| <b>ASC-US</b>   | 605              | 29%  | 21                 | 4%    | 165             | 44% | 333           | 43% | 44            | 30%  | 21                 | 16%  | 0             | 0%   | 21            | 46%  |
| HPV16/18+       | 103              | 17%  | 3                  | 14%   | 23              | 14% | 48            | 14% | 13            | 30%  | 12                 | 57%  | 0             | 0%   | 4             | 19%  |
| HR HPV12+       | 393              | 65%  | 13                 | 62%   | 108             | 66% | 225           | 68% | 26            | 59%  | 7                  | 33%  | 0             | 0%   | 14            | 67%  |
| DS+             | 289              | 48%  | 9                  | 43%   | 67              | 41% | 158           | 48% | 31            | 71%  | 18                 | 86%  | 0             | 0%   | 6             | 29%  |
| <b>LSIL</b>     | 432              | 21%  | 16                 | 3%    | 70              | 19% | 271           | 35% | 39            | 27%  | 24                 | 19%  | 0             | 0%   | 12            | 26%  |
| HPV16/18+       | 72               | 17%  | 2                  | 12.5% | 6               | 9%  | 41            | 15% | 10            | 26%  | 11                 | 46%  | 0             | 0%   | 2             | 17%  |
| HR HPV12+       | 286              | 66%  | 11                 | 69%   | 52              | 74% | 179           | 66% | 25            | 64%  | 12                 | 50%  | 0             | 0%   | 7             | 58%  |
| DS+             | 254              | 59%  | 9                  | 56%   | 40              | 57% | 145           | 54% | 30            | 77%  | 21                 | 88%  | 0             | 0%   | 9             | 75%  |
| <b>ASC-H</b>    | 93               | 5%   | 1                  | 0%    | 8               | 2%  | 32            | 4%  | 25            | 17%  | 27                 | 21%  | 0             | 0%   | 0             | 0%   |
| HPV16/18+       | 31               | 33%  | 1                  | 0%    | 2               | 25% | 8             | 25% | 9             | 36%  | 12                 | 44%  | 0             | 0%   | 0             | 0%   |
| HR HPV12+       | 50               | 54%  | 1                  | 100%  | 4               | 50% | 21            | 66% | 13            | 52%  | 11                 | 41%  | 0             | 0%   | 0             | 0%   |
| DS+             | 82               | 88%  | 0                  | 0%    | 6               | 75% | 27            | 84% | 22            | 88%  | 27                 | 100% | 0             | 0%   | 0             | 0%   |
| <b>HSIL</b>     | 59               | 3%   | 0                  | 0%    | 3               | 1%  | 9             | 1%  | 7             | 5%   | 38                 | 29%  | 1             | 100% | 1             | 2%   |
| HPV16/18+       | 34               | 58%  | 0                  | 0%    | 1               | 33% | 4             | 44% | 5             | 71%  | 22                 | 58%  | 1             | 100% | 1             | 100% |
| HR HPV12+       | 18               | 31%  | 0                  | 0%    | 1               | 33% | 3             | 33% | 2             | 29%  | 12                 | 32%  | 0             | 0%   | 0             | 0%   |
| DS+             | 55               | 93%  | 0                  | 0%    | 2               | 67% | 7             | 78% | 7             | 100% | 37                 | 97%  | 1             | 100% | 1             | 100% |
| <b>Total</b>    | 2,066            | 100% | 588                | 28%   | 372             | 18% | 783           | 38% | 146           | 7%   | 130                | 6%   | 1             | 0%   | 46            | 2%   |
| HPV16/18+       | 383              | 19%  | 91                 | 15%   | 48              | 13% | 118           | 15% | 49            | 34%  | 67                 | 52%  | 1             | 100% | 9             | 20%  |
| HR HPV12+       | 1,335            | 65%  | 392                | 67%   | 253             | 68% | 529           | 68% | 81            | 56%  | 51                 | 39%  | 0             | 0%   | 29            | 63%  |
| DS+             | 983              | 48%  | 191                | 32%   | 157             | 42% | 387           | 49% | 108           | 74%  | 118                | 91%  | 1             | 100% | 21            | 46%  |

HPV16/18+: positive for either HPV16 or HPV18; HR HPV12+: positive for at least one of the other high-risk HPV types; DS: Dual stain cytology; NILM: negative for intraepithelial lesion or malignancy, ASC-US: Atypical Squamous Cells of Undetermined Significance, LSIL: Low Grade Squamous Intraepithelial Lesions; ASC-H: Atypical Squamous Cells, Cannot Rule Out High-Grade Squamous Intraepithelial Lesion; HSIL: High Grade Squamous Intraepithelial Lesion, CIN: cervical intraepithelial neoplasia (grades 1-3), AIS, adenocarcinoma in situ

**eTable 4.** Performance of Cytology, Dual Stain, HPV16/18 and Combinations Among 2066 HPV-Positive Women Without Preceding Abnormal Co-Test to Detect CIN3+ (n=131) and CIN2+ (n=277)

|                                   | <b>Cytology + HPV16/18<br/>(95% CI)</b>   | <b>Dual stain + HPV16/18<br/>(95% CI)</b>             | <b>Cytology<br/>(95% CI)</b>                    | <b>Dual stain<br/>(95% CI)</b>                 |
|-----------------------------------|-------------------------------------------|-------------------------------------------------------|-------------------------------------------------|------------------------------------------------|
| <b>Threshold</b>                  | Either ASC-US+ or HPV16 or HPV18 positive | 1 dual stain positive cell or HPV16 or HPV18 positive | ASC-US+                                         | dual stain positive cell                       |
| <b>Positivity</b>                 | 1332/2066<br>(64.7%; 62.6-66.7%)          | 1113/2066<br>(54.0% <sup>**</sup> ; 51.8-56.2%)       | 1189/2066<br>(57.8% <sup>**</sup> ; 55.6-60.0%) | 983/2066<br>(47.6% <sup>**</sup> ; 45.4-50.0%) |
| <b>Detection of CIN3+ (n=131)</b> |                                           |                                                       |                                                 |                                                |
| <b>Sensitivity</b>                | 121/131<br>(92.4%; 87.8-96.9%)            | 121/131<br>(92.4%; 87.8-96.9%)                        | 111/131<br>(84.7%; 78.6-90.9%)*                 | 119/131<br>(90.8%; 85.9-95.8%)                 |
| <b>Specificity</b>                | 724/1935<br>(37.2%; 35.3-39.6%)           | 943/1935<br>(48.7%; 46.5-51.0%) <sup>**</sup>         | 857/1935<br>(44.3%; 42.1-46.5%) <sup>**</sup>   | 1071/1935<br>(55.3%; 53.1-57.6%) <sup>**</sup> |
| <b>PPV</b>                        | 121/1332<br>(9.1%; 7.5-10.6%)             | 121/1113<br>(10.9%; 9.0-12.7%) <sup>**</sup>          | 111/1189<br>(9.3%; 7.7-11.0%)                   | 119/983<br>(12.1%; 10.1-14.1%) <sup>**</sup>   |
| <b>NPV</b>                        | 724/734<br>(98.6%; 97.8-99.5%)            | 943/953<br>(99.0%; 98.3-99.6%)                        | 857/877<br>(97.7%; 96.7-98.7%)*                 | 1071/1083<br>(98.9%; 98.3-99.5%)               |
| <b>Detection of CIN2+ (n=277)</b> |                                           |                                                       |                                                 |                                                |
| <b>Sensitivity</b>                | 248/277<br>(89.5%; 85.9-93.1%)            | 242/277<br>(87.4%; 83.5-91.3%)                        | 226/277<br>(81.6%; 77.0-86.2%) <sup>**</sup>    | 227/277<br>(81.9%; 77.4-86.5%)*                |
| <b>Specificity</b>                | 705/1789<br>(39.4%; 37.1-41.7%)           | 921/1789<br>(51.3%; 49.0-53.6%) <sup>**</sup>         | 826/1789<br>(46.2%; 43.9-48.5%) <sup>**</sup>   | 1033/1789<br>(57.7%; 55.4-60.0%) <sup>**</sup> |
| <b>PPV</b>                        | 248/1332<br>(18.6%; 16.5-20.7%)           | 242/1113<br>(21.7%; 19.3-24.2%) <sup>**</sup>         | 226/1189<br>(19.0%; 16.8-21.2%)                 | 227/983<br>(23.1%; 20.5-25.7%) <sup>**</sup>   |
| <b>NPV</b>                        | 705/734<br>(96.0%; 94.6-97.5%)            | 918/953<br>(96.3%; 95.1-97.5%)                        | 826/877<br>(94.2%; 92.6-95.7%)*                 | 1033/1083<br>(95.4%; 94.1-96.6%)               |

\*p<0.05; \*\*p<0.001 compared to cytology + HPV16/18 calculated using McNemar test for positivity and sensitivity and specificity and the Leisenring method for predictive values. ASC-US+: Atypical Squamous Cells of Undetermined Significance or more severe cytologic diagnosis, PPV: positive predictive value, NPV: negative predictive value, CIN3+: cervical intraepithelial neoplasia grade 3 or worse, CIN2+: cervical intraepithelial neoplasia grade 2 or worse

**eTable 5.** Risk of CIN3+ and CIN2+ in Strata of Cytology, HPV16/18 Genotype and Dual Stain Results in Women With Preceding Normal Co-Tests

| Stratum                        | All women in stratum | CIN3+ in stratum | Risk  | 95% Confidence Interval | CIN2+ in stratum | Risk  | 95% Confidence Interval |
|--------------------------------|----------------------|------------------|-------|-------------------------|------------------|-------|-------------------------|
| HSIL cytology; HPV16/18+; DS+  | 34                   | 23               | 67.7% | 49.5 - 82.6%            | 28               | 82.4% | 65.5 - 93.2%            |
| HSIL cytology; HPV16/18+; DS-  | 0                    | 0                | NE    | -                       | 0                | NE    |                         |
| HSIL cytology; HPV16/18-; DS+  | 21                   | 15               | 71.4% | 47.8 - 88.7%            | 17               | 81.0% | 58.1 - 94.6%            |
| HSIL cytology; HPV16/18-; DS-  | 4                    | 1                | 25.0% | 4.6 - 69.9%             | 1                | 25.0% | 4.6 - 69.9%             |
| ASCH cytology; HPV16/18+; DS+  | 28                   | 12               | 42.9% | 24.5 - 62.8%            | 20               | 71.4% | 51.3 - 86.8%            |
| ASCH cytology; HPV16/18+; DS-  | 3                    | 0                | 0.0%  | 0.0 - 70.8%             | 1                | 33.3% | 0.8 - 90.6%             |
| ASCH cytology; HPV16/18-; DS+  | 54                   | 15               | 27.8% | 16.5 - 41.6%            | 29               | 53.7% | 39.6 - 67.4%            |
| ASCH cytology; HPV16/18-; DS-  | 8                    | 0                | 0.0%  | 0.0 - 36.9%             | 2                | 25.0% | 7.2 - 59.1%             |
| LSIL cytology; HPV16/18+; DS+  | 61                   | 11               | 18.0% | 9.4 - 30.0%             | 20               | 32.8% | 21.3 - 46.0%            |
| LSIL cytology; HPV16/18+; DS-  | 11                   | 0                | 0.0%  | 0.0 - 28.5%             | 1                | 9.1%  | 0.2 - 4.3%              |
| LSIL cytology; HPV16/18-; DS+  | 193                  | 10               | 5.2%  | 2.5 - 9.3%              | 31               | 16.1% | 11.2 - 22.0%            |
| LSIL cytology; HPV16/18-; DS-  | 167                  | 3                | 1.8%  | 0.4 - 5.2%              | 11               | 6.6%  | 3.3 - 11.5%             |
| ASCUS cytology; HPV16/18+; DS+ | 59                   | 11               | 18.6% | 9.7 - 30.9%             | 20               | 33.9% | 22.1 - 47.4%            |
| ASCUS cytology; HPV16/18+; DS- | 44                   | 1                | 2.3%  | 0.1 - 12.0%             | 5                | 11.4% | 3.8 - 24.6%             |
| ASCUS cytology; HPV16/18-; DS+ | 230                  | 7                | 3.0%  | 1.2 - 6.2%              | 29               | 12.6% | 8.6 - 17.6%             |
| ASCUS cytology; HPV16/18-; DS- | 272                  | 2                | 0.7%  | 0.1 - 2.6%              | 11               | 4.0%  | 2.0 - 7.1%              |
| NILM cytology; HPV16/18+; DS+  | 71                   | 9                | 12.7% | 6.0 - 22.7%             | 14               | 19.7% | 11.2 - 30.9%            |
| NILM cytology; HPV16/18+; DS-  | 72                   | 1                | 1.4%  | 0.0 - 7.5%              | 8                | 11.1% | 5.7 - 20.4%             |
| NILM cytology; HPV16/18-; DS+  | 232                  | 6                | 2.6%  | 1.0 - 5.5%              | 19               | 8.2%  | 5.0 - 12.5%             |
| NILM cytology; HPV16/18-; DS-  | 502                  | 4                | 0.8%  | 0.2 - 2.0%              | 10               | 2.0%  | 1.0 - 3.6%              |

HPV16/18+: positive for either HPV16 or HPV18; DS: Dual stain cytology; NILM: negative for intraepithelial lesion or malignancy, ASC-US: Atypical Squamous Cells of Undetermined Significance, LSIL: Low Grade Squamous Intraepithelial Lesions; ASC-H: Atypical Squamous Cells, Cannot Rule Out High-Grade Squamous Intraepithelial Lesion; HSIL: High Grade Squamous Intraepithelial Lesion; CIN3+: cervical intraepithelial neoplasia grade 3 or worse, CIN2+: cervical intraepithelial neoplasia grade 2 or worse; NE, not estimable

**eFigure 1.** Screening and Triage Algorithms

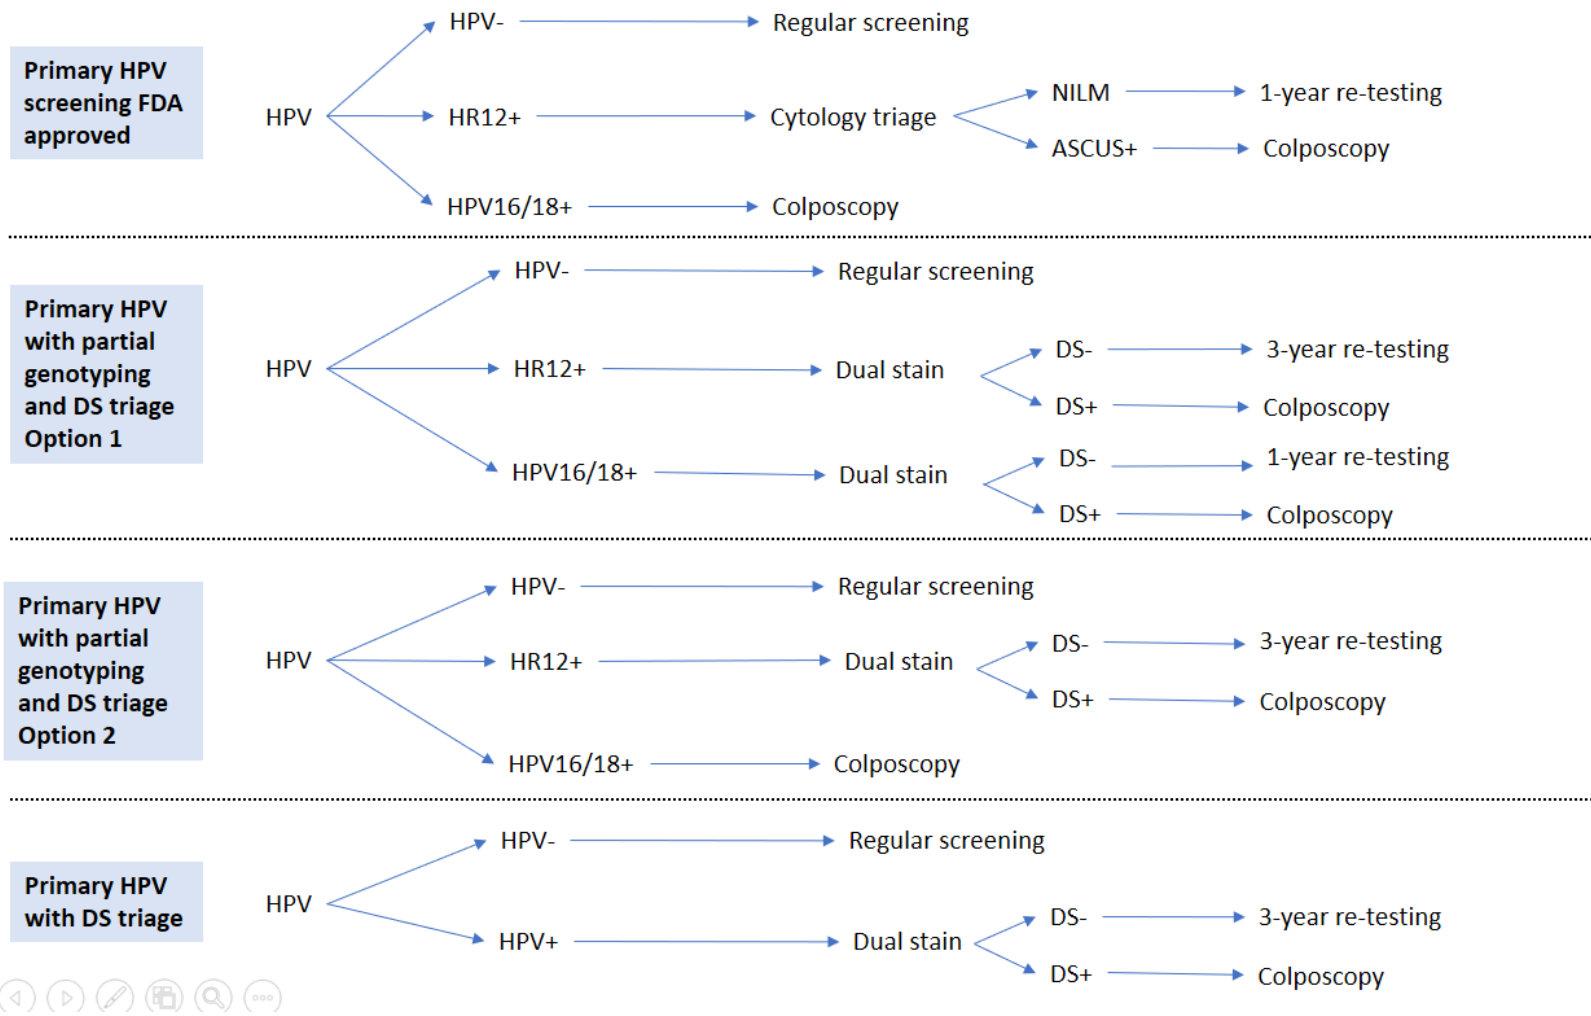

**eFigure 2.** Risk of CIN3+ in Strata of Cytology, Dual Stain, and HPV16/18 Among Women With Normal Preceding Co-Test

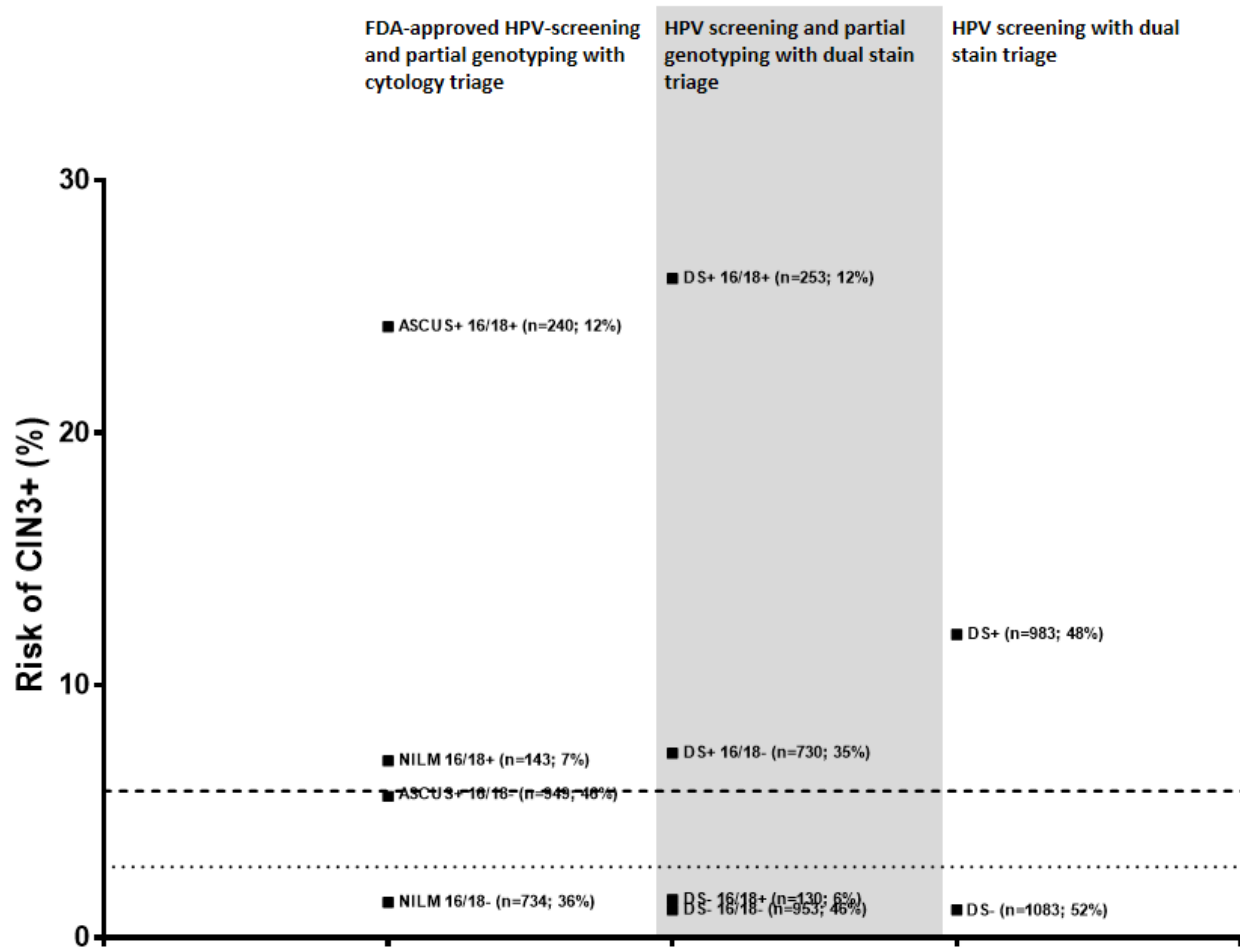

Dotted line: 1-year return threshold (HPV-positive NILM, 2.8%); dashed line: Colposcopy referral threshold (HPV-positive ASC-US, 5.7%). The number and corresponding percentage of women testing positive for each test result is shown in parentheses. Absolute risk of CIN3+ is plotted on the y-axis. Abbreviations: NILM: negative for intraepithelial lesion or malignancy, ASC-US+: Atypical Squamous Cells of Undetermined Significance or more severe cytologic diagnosis, 16/18+/-: HPV16/18 positive or HPV16/18 negative, respectively, DS+/-: dual stain positive or dual stain negative, respectively; CIN3+, cervical intraepithelial neoplasia grade 3 or more severe histologic diagnosis.
